# Supplementary material
Source: MDPI journal article supplement (https://www.mdpi.com/1999-4907/12/11/1561)
Supplement: s1 [file s1]

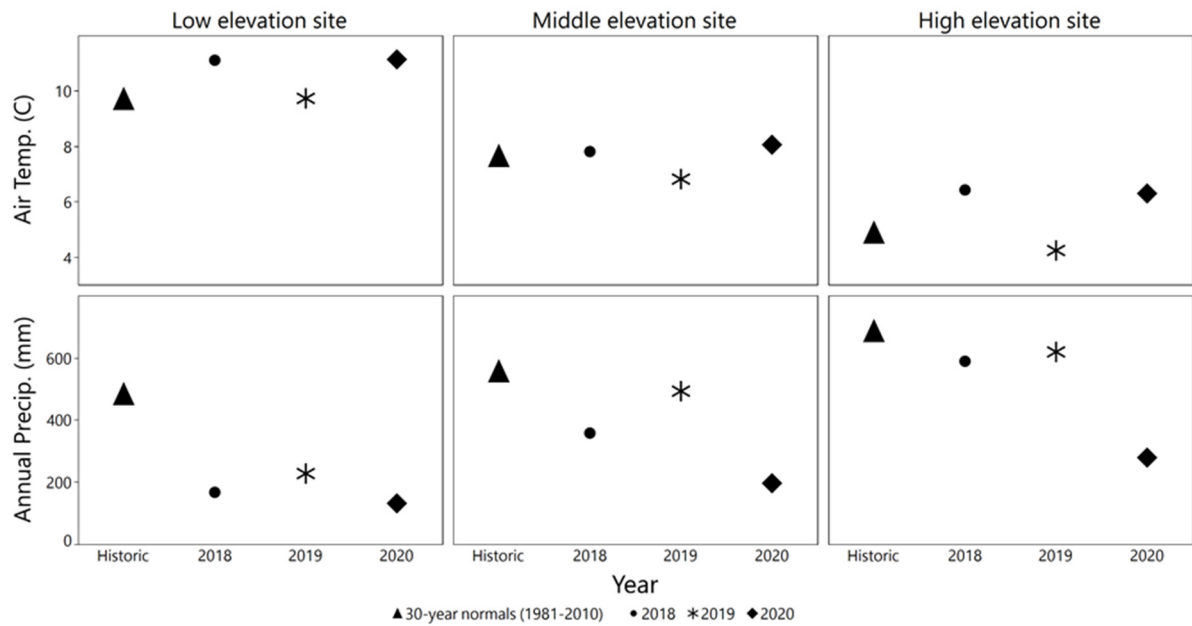

**Supplementary Figure S1 .** Mean air temperature (°C) and Annual precipitation for the study period (2018-2020) compared to 30-year normals (1981-2010; <https://prism.oregonstate.edu/>) accessed on 19 September 2020 . At each site, gaps in weather station data were included via PRISM.

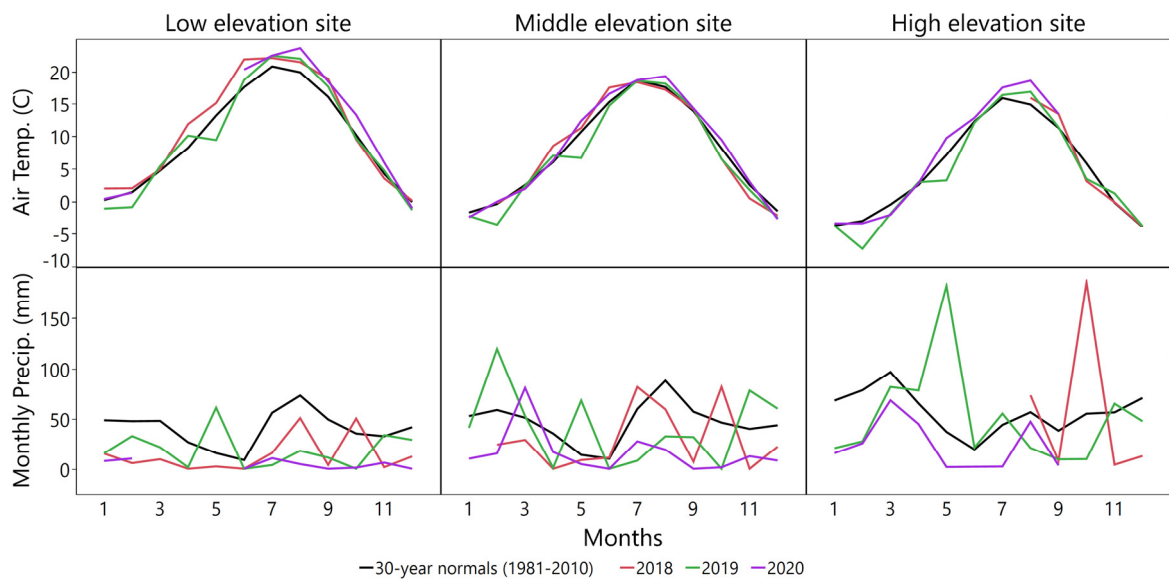

**Supplementary Figure S2 .** Monthly air temperature (°C) and precipitation for the study period (2018-2020) compared to 30-year normals (1981-2010; <https://prism.oregonstate.edu/>) accessed on 19 September 2020). Gaps in line represent unavailable data from weather stations.

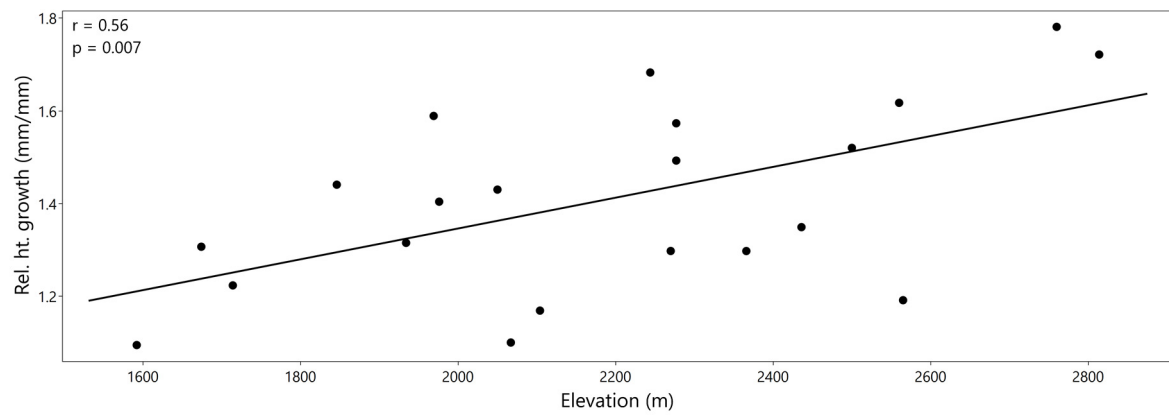

**Supplementary Figure S3.** Relationship between relative height growth and provenance elevation at the mid-elevation site.
